# Supplementary material
Source: MDPI journal article supplement (https://www.mdpi.com/2075-1702/10/9/803)
Supplement: s1 [file s1]

## Supplementary Information (SI)

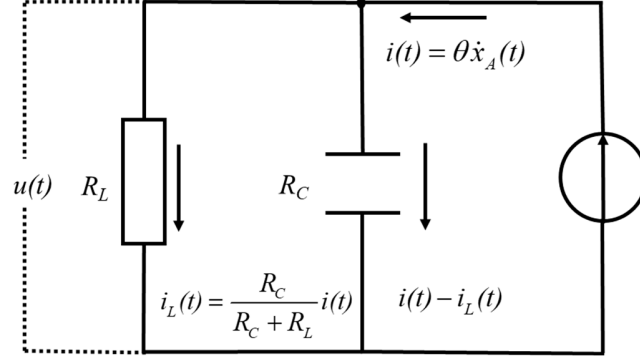

Figure S1. The equivalent RC parallel circuit of the harvester.

In Figure S1,  $i(t)$  is the total instantaneous current generated by the harvester;  $i_L(t)$  represents the instantaneous output current;  $R_L$  and  $R_C$  are the external resistance and capacitive reactance, respectively. The instantaneous output voltage  $u(t)$  and power  $p(t)$  are:

$$u(t) = \left( \frac{R_C}{R_C + R_L} i(t) \right) R_L = \frac{R_C}{\frac{R_C}{R_L} + 1} \theta \dot{x}_A(t) \quad (1)$$

$$p(t) = \left( \frac{R_C}{R_C + R_L} i(t) \right)^2 R_L = \frac{R_C^2}{\frac{R_C^2}{R_L} + 2R_C + R_L} \theta^2 \dot{x}_A(t)^2 \quad (2)$$

where  $\theta$  represents the electromechanical coupling coefficient, and  $x_A(t)$  is the vertical displacement of the tip magnet at the free end of the piezoelectric beam. The capacitive reactance is given by:

$$R_C = \frac{1}{2\pi f C_p} \quad (3)$$

where  $f$  and  $C_p$  represent the frequency of the excitation and the equivalent capacitance of the piezoelectric patch, respectively.
